# Supplementary material for: Cytoskeletal-based mechanisms differently regulate in vivo and in vitro proplatelet formation
Source: PubMed Central journal article supplement — Haematologica. 2020 Apr 23;106(5):1368–80. doi: 10.3324/haematol.2019.239111 (PMC8094084; doi:10.3324/haematol.2019.239111), 2020-04-23
Supplement: 2019_239111-DisclosuresContributions.pdf [file 2019_239111-DisclosuresContributions.pdf]

Haematologica  
HAEMATOL/2019/239111  
Version 4

Cytoskeletal-based mechanisms differently regulate in vivo and in vitro  
proplatelet formation

Alicia Bornert, Julie Boscher, Fabien Pertuy, Anita Eckly, David Stegner, Catherine Strassel, Christian Gachet, François Lanza, and Catherine Léon

Disclosures: none

Contributions: Contribution: A.B. conducted all intravital experiments and analyses. J.B. and C.S. performed in vitro experiments and F.P. developed the experimental intravital set up. A.E. performed electron microscopy. D.S. provided important key reagent. C.G. and F.L. wrote the manuscript. C.L. designed and analyzed experiments and wrote the manuscript.
